# Supplementary material
Source: PubMed Central journal article supplement (PMC5600704)

Supporting Information for

**Synthesis of Azobenzenes Using *N*-Chlorosuccinimide and DBU**

*Alford Antoine John, and Qing Lin\**

Department of Chemistry, State University of New York at Buffalo, Buffalo, New York 14260-3000, United States

**NMR spectra**

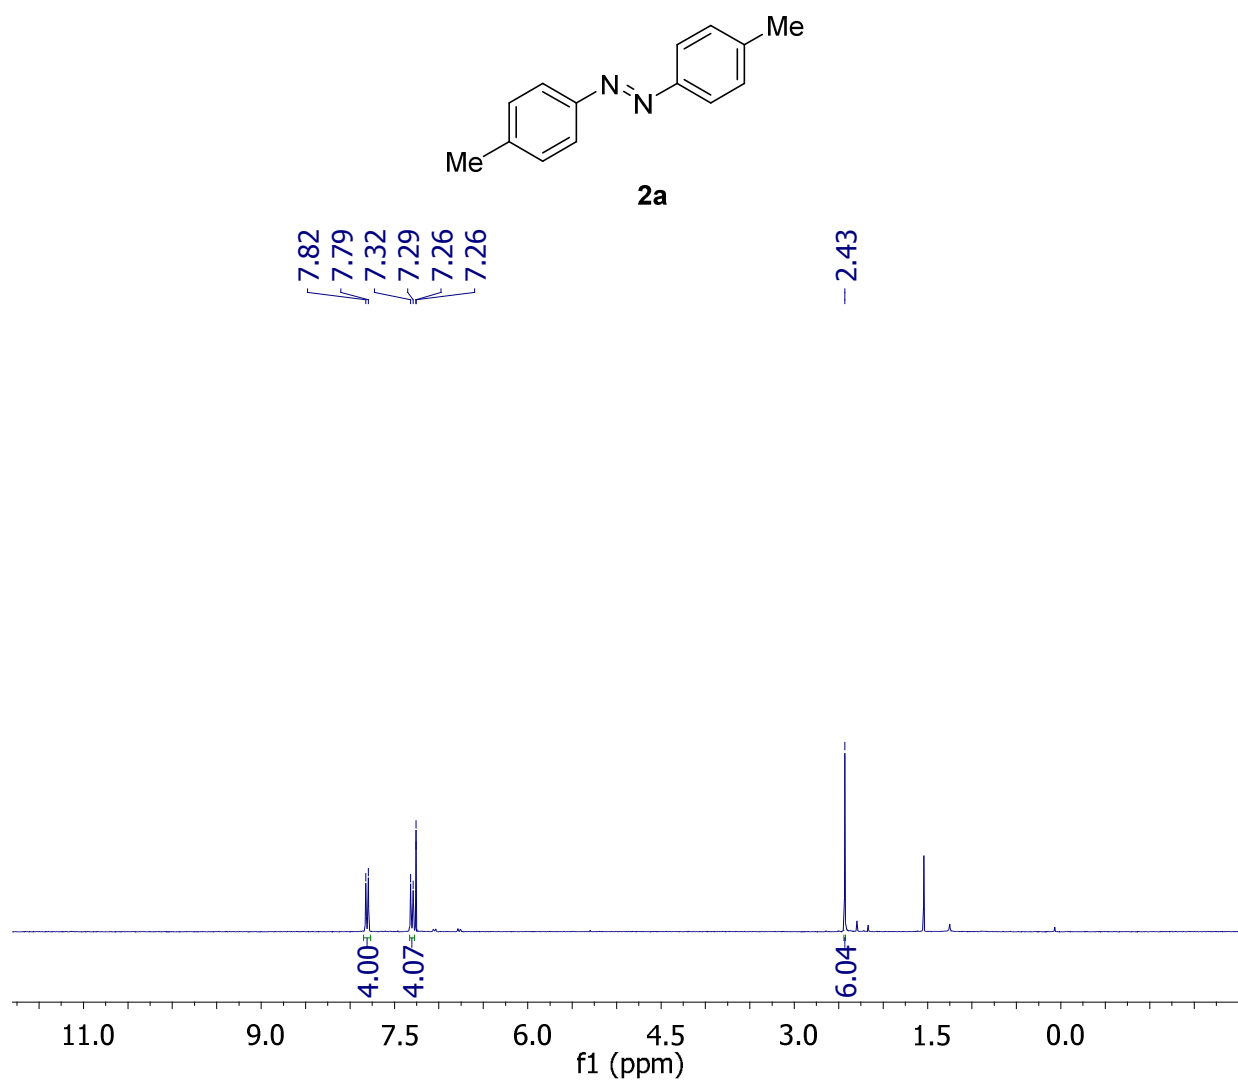

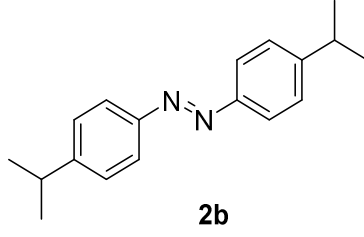

7.87  
7.84  
7.38  
7.38  
7.36  
7.26  
7.26

3.05  
3.03  
3.01  
3.00  
2.98  
2.96  
2.95  
1.32  
1.30

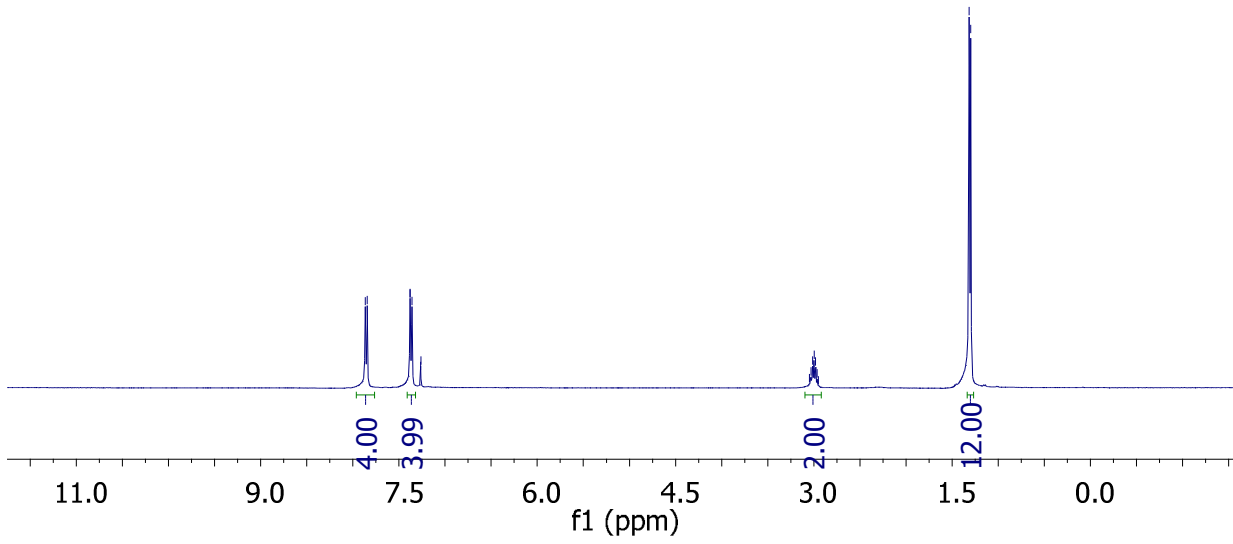

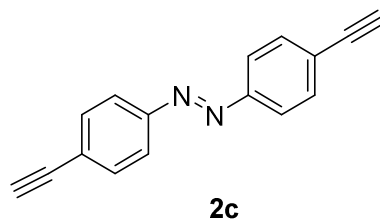

7.90  
7.87  
7.65  
7.62  
7.26

-3.24

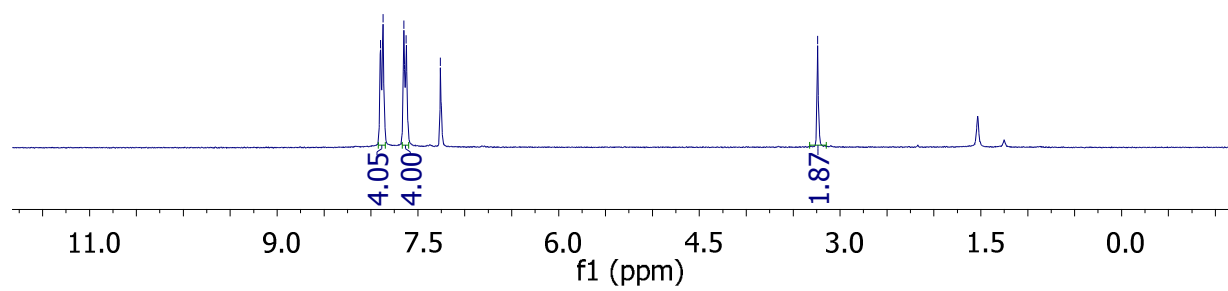

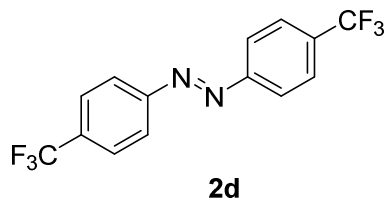

8.05  
8.03  
7.82  
7.80  
7.26

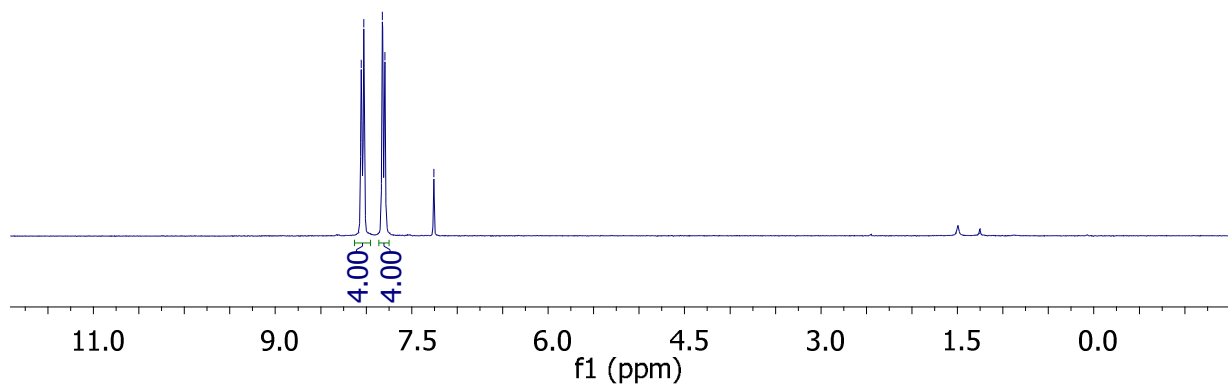

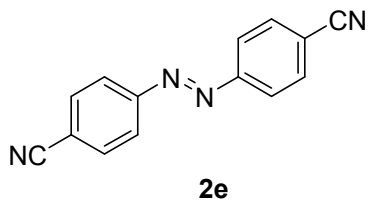

8.05  
8.02  
7.87  
7.84  
7.26

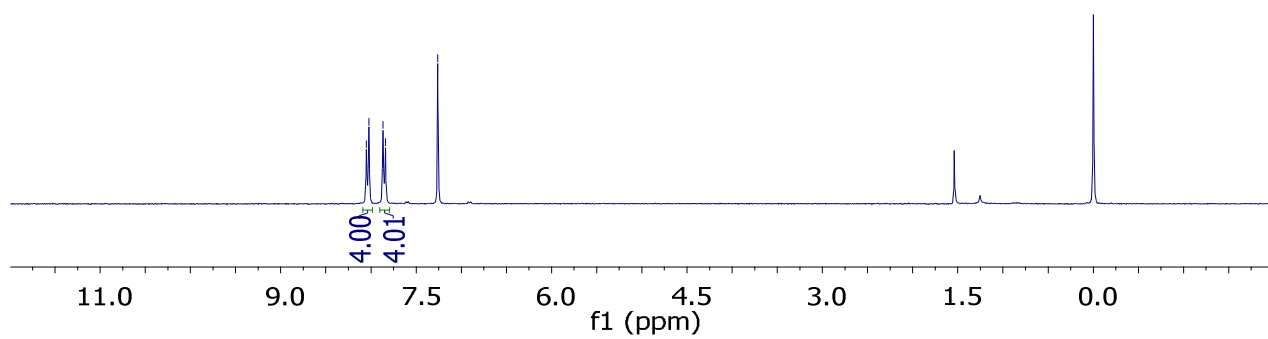

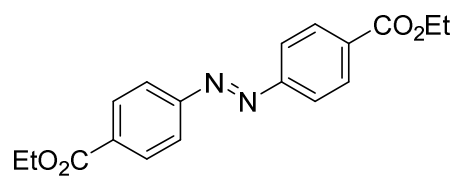

**2f**

8.22  
8.20  
7.99  
7.97  
7.26

4.45  
4.44  
4.42  
4.40

1.45  
1.43  
1.42

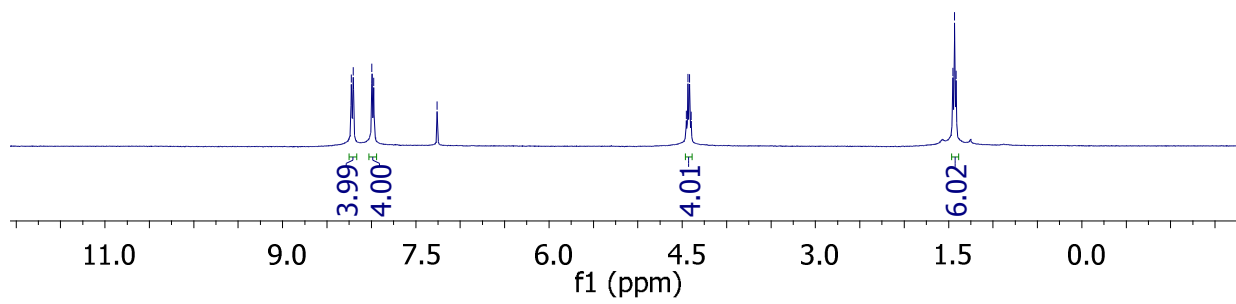

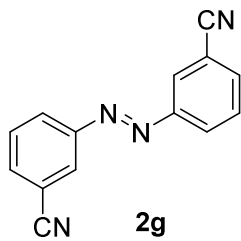

8.23  
8.20  
8.18  
7.82  
7.82  
7.80  
7.80  
7.71  
7.69  
7.67  
7.26  
7.26

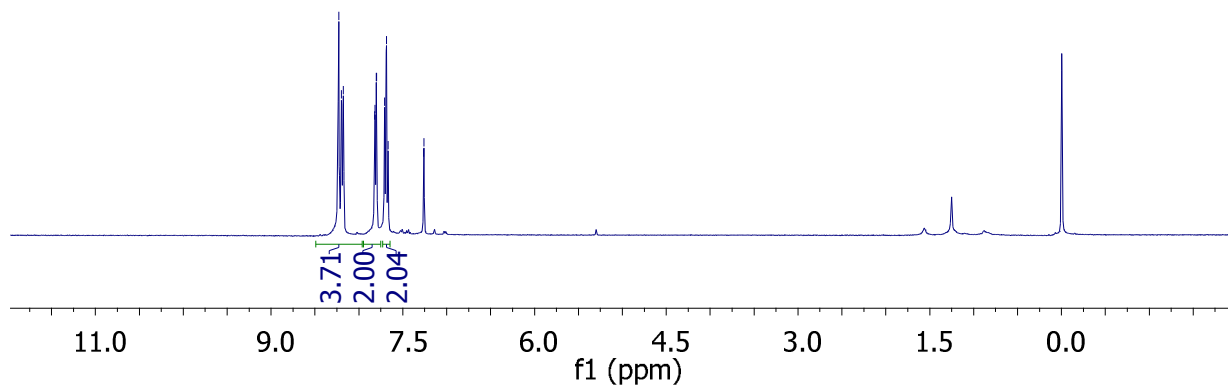

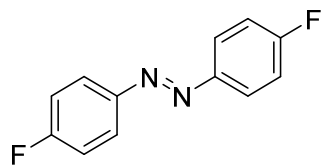

2h

7.94  
7.93  
7.92  
7.91  
7.26  
7.22  
7.20  
7.18

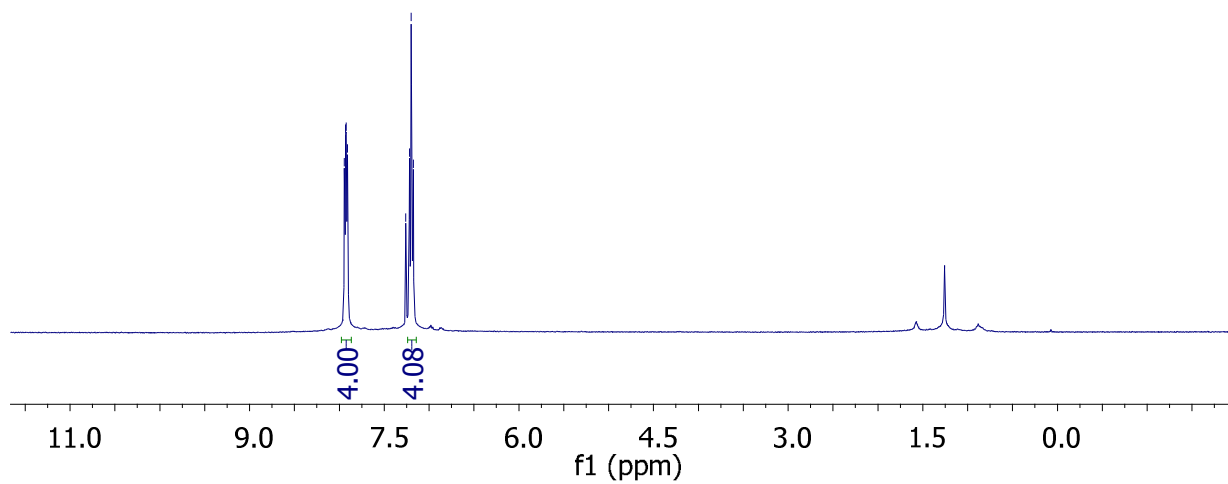



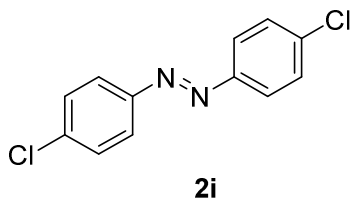

7.80  
7.78  
7.66  
7.63  
7.26

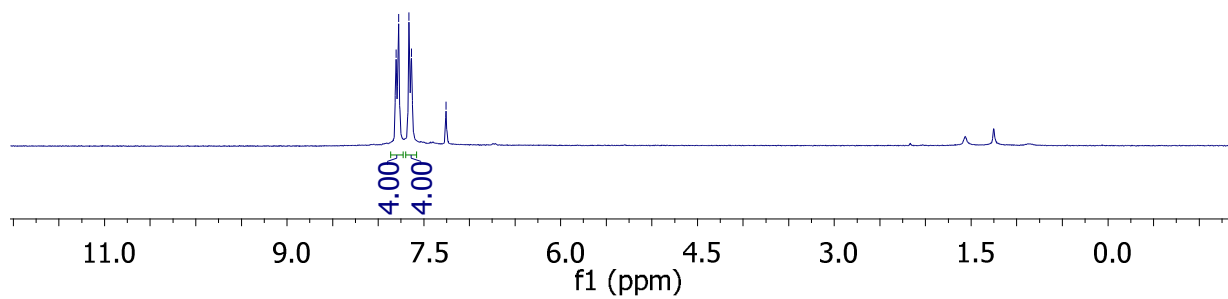

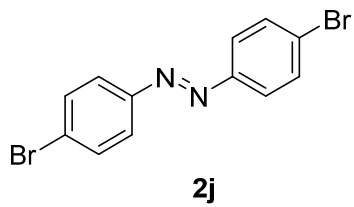

7.88  
7.85  
7.50  
7.48  
7.26

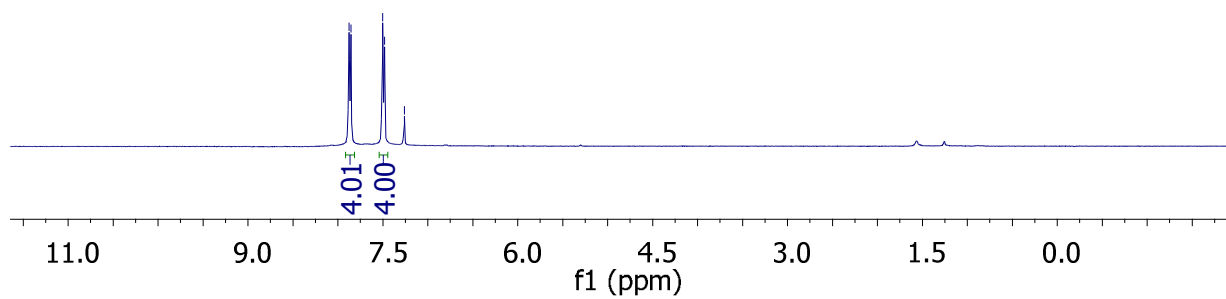

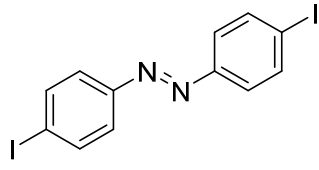

2k

7.88  
7.86  
7.65  
7.63  
7.26

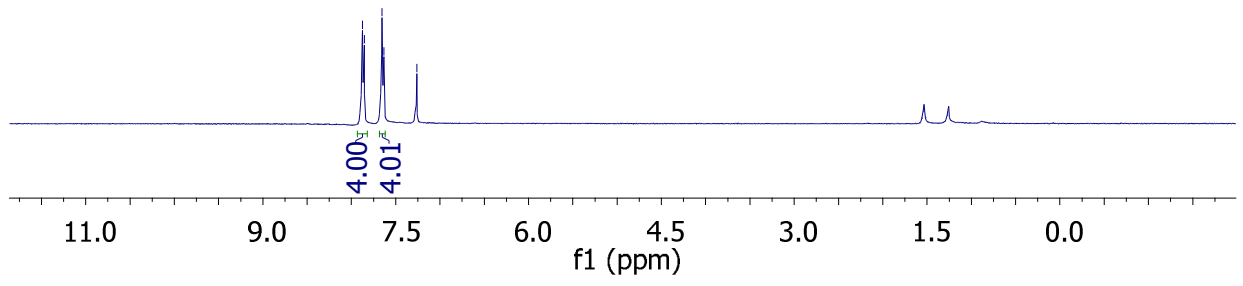

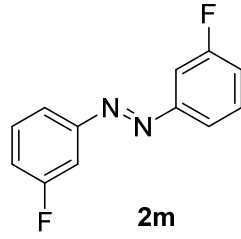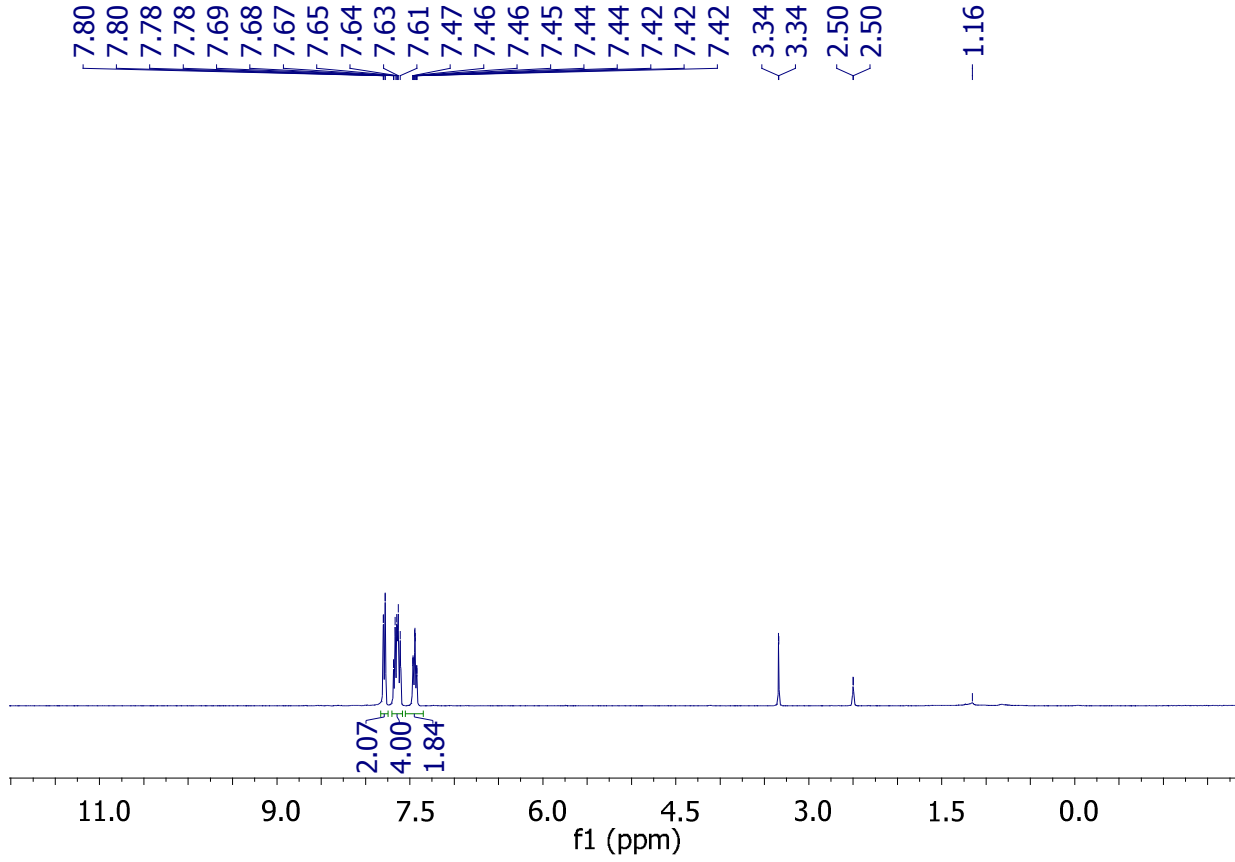

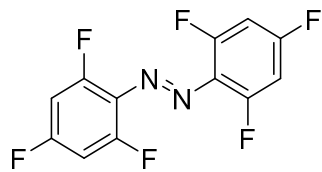

2n

- 7.26  
- 6.84

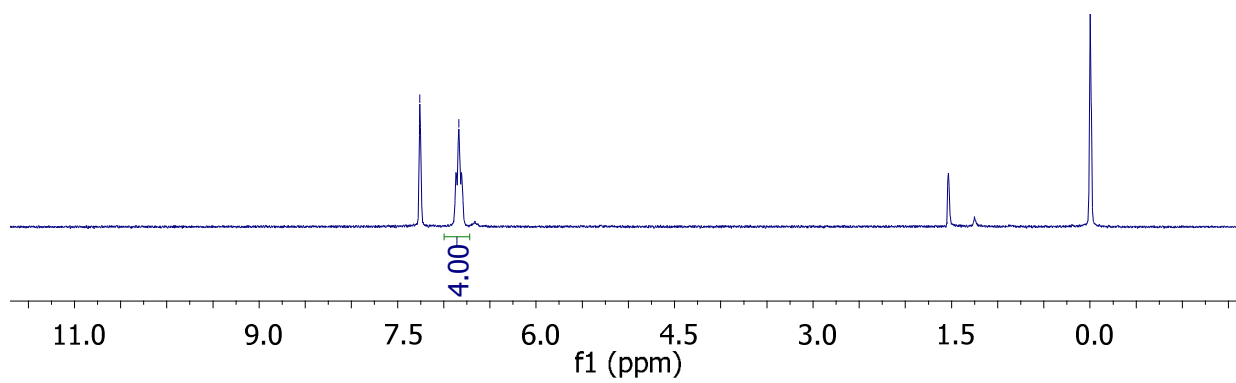

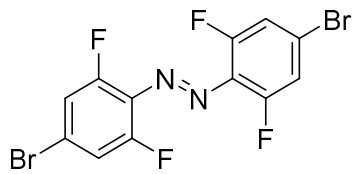

2o

7.79  
7.76

2.49

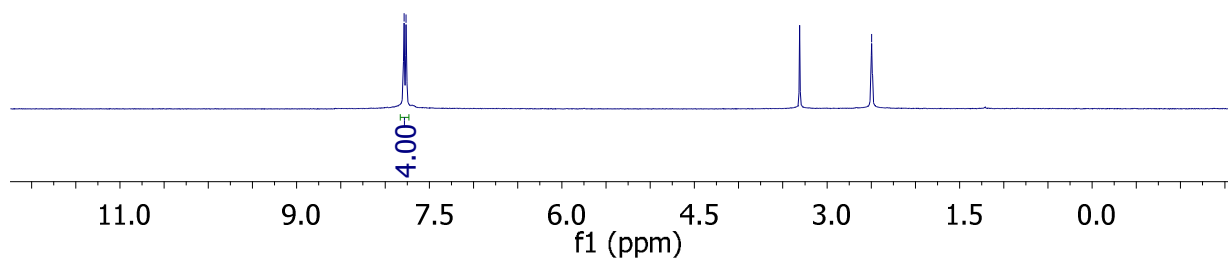

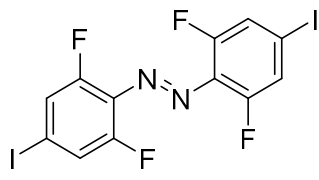

2p

7.83  
7.80

-2.48

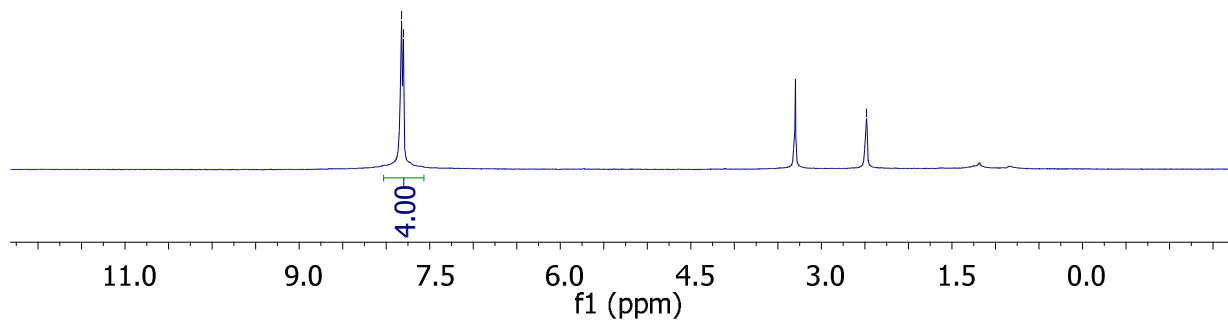

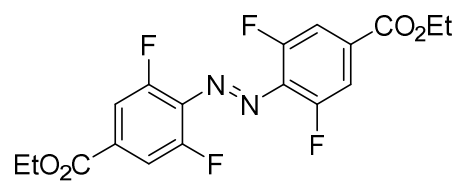

2q

{ 7.76  
7.73  
7.26

{ 4.46  
4.44  
4.42  
4.40

{ 1.45  
1.43  
1.41

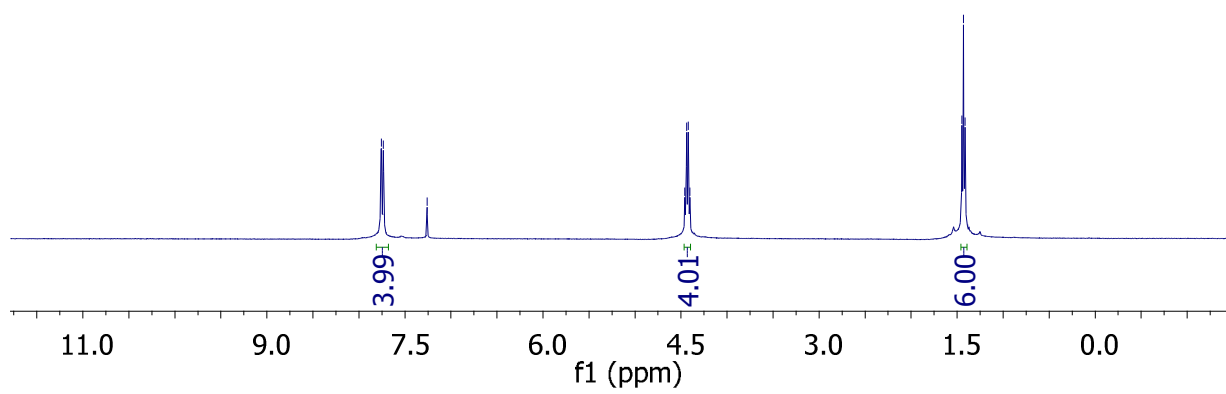



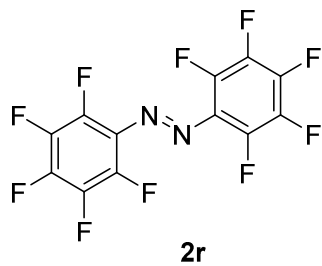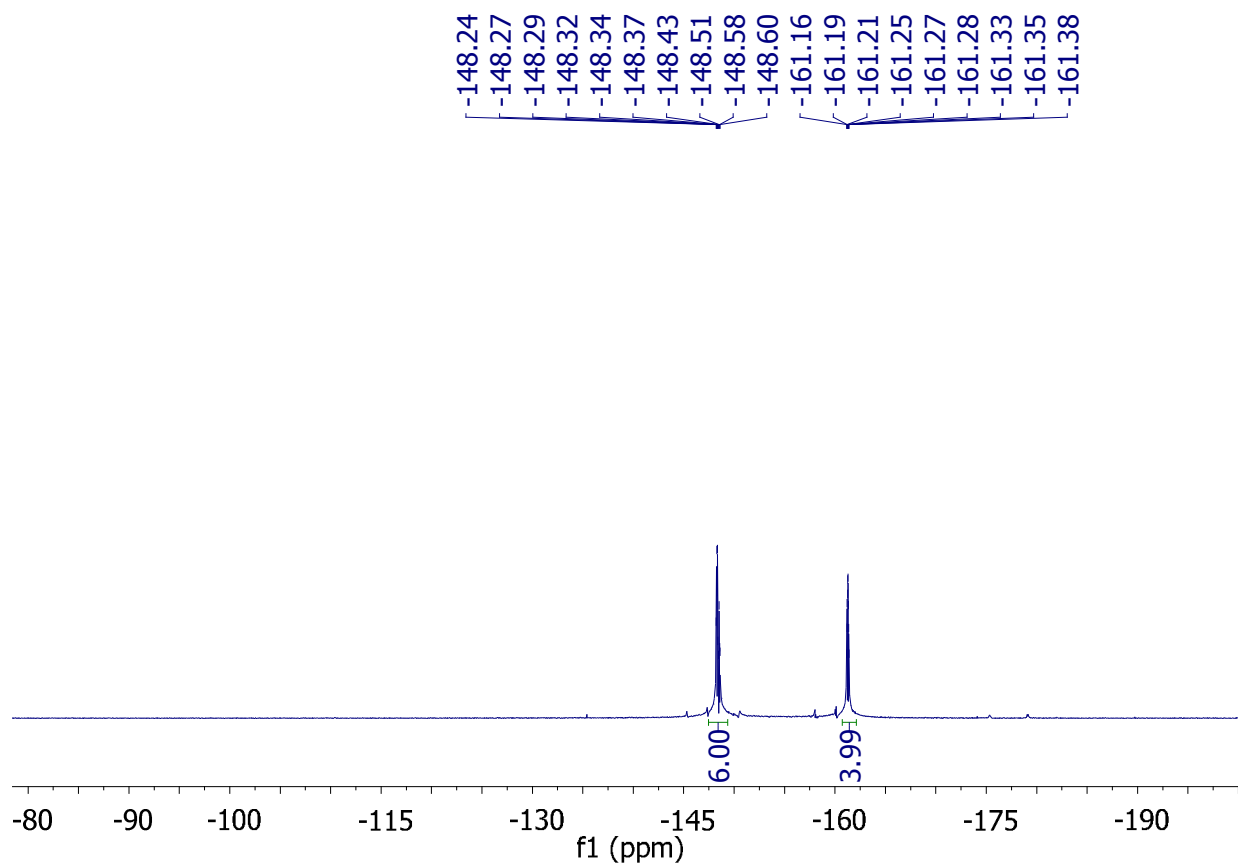

Supplement: NIHMS902573-supplement-1.pdf [file NIHMS902573-supplement-1.pdf]
